# Supplementary material for: Barriers to HIV pre-exposure prophylaxis among African, Caribbean and Black men in Toronto, Canada
Source: PubMed Central journal article supplement (PMC6440797; doi:10.1371/journal.pone.0213740), 2019-03-29
Supplement: pone.0213740.s001.pdf [file pone.0213740.s001.pdf]

**S1 Table. Questions used to assess participants' knowledge about HIV and other STIs.**

|                                                                                                                                          |
|------------------------------------------------------------------------------------------------------------------------------------------|
| 1. People can protect themselves from HIV, the virus that causes AIDS, by using a condom correctly every time they have anal sex.        |
| 2. Having sex with only one faithful, uninfected partner can reduce the risk of getting or giving HIV.                                   |
| 3. A healthy looking person can have HIV.                                                                                                |
| 4. When one partner is HIV-infected and has an undetectable viral load, it is less important that a condom be used.                      |
| 5. Because there are now good HIV medications available, I am not very concerned about getting HIV.                                      |
| 6. With receptive oral sex (sucking your partner) without a condom, there is a small but significant risk of HIV infection.              |
| 7. If you have anal sex initially without a condom and then put one on before ejaculating, there is a significant risk of HIV infection. |
| 8. I would always have symptoms if I was infected with HIV.                                                                              |
| 9. I would always have symptoms if I contracted a sexually transmitted infection.                                                        |
| 10. Syphilis can be transmitted through unprotected oral sex.                                                                            |
| 11. I would always have symptoms if I was infected with hepatitis C.                                                                     |
| 12. There is treatment currently available for hepatitis C.                                                                              |
| 13. Condoms can effectively prevent sexually transmitted infections (STIs).                                                              |
| 14. Condoms can effectively prevent HIV/AIDS.                                                                                            |
| 15. You can use cooking oil or Vaseline for lubrication when using a condom.                                                             |
| 16. Some space should be left at the tip of the condom to allow for sperm.                                                               |
| 17. A condom should be unrolled before putting it on the penis.                                                                          |
